# Supplementary material for: Whole blood transcriptional responses of very preterm infants during late-onset sepsis
Source: PLoS One. 2020 Jun 1;15(6):e0233841. doi: 10.1371/journal.pone.0233841 (PMC7263612; doi:10.1371/journal.pone.0233841)
Supplement: S3 Table — (CSV) [file pone.0233841.s003.csv]

ensembl_gene_id	hgnc_symbol	baseMean	log2FoldChange	lfcSE	stat	pvalue	padj	ABSLFC	FC
ENSG00000101187	SLCO4A1	29.0989102791573	1.80454569288369	0.446880662840473	4.03809303677092	5.38874818500257e-05	0.0380493015951195	1.80454569288369	3.49319139855221
ENSG00000111331	OAS3	295.680029203716	1.80107687095952	0.446968478250257	4.02953890173683	5.58863670919747e-05	0.0380493015951195	1.80107687095952	3.48480244396364
ENSG00000118503	TNFAIP3	501.302849999161	1.7033509621646	0.424540537869838	4.01222217956213	6.01498478248568e-05	0.0387966518470327	1.7033509621646	3.25656486336594
ENSG00000119917	IFIT3	623.562008348078	1.90584076413157	0.446330661015791	4.27001980951548	1.95455606583051e-05	0.0262158746869214	1.90584076413157	3.74727216364573
ENSG00000120217	CD274	59.408378795446	1.86658308987575	0.443492839312534	4.20882351284223	2.56703791304004e-05	0.0262158746869214	1.86658308987575	3.64667869230836
ENSG00000123360	PDE1B	60.2589901951771	0.996102557215105	0.250874358708915	3.97052358137113	7.1714857241297e-05	0.0418507416900997	0.996102557215105	1.99460428858723
ENSG00000125730	C3	41.9253981583523	2.03380734030108	0.447092981731652	4.54895832277185	5.39121180142701e-06	0.0117158235212575	2.03380734030108	4.09484073391491
ENSG00000129277	NA	145.172700647217	1.78248247219687	0.446419841411922	3.99283881863157	6.528694858234e-05	0.0400045777438288	1.78248247219687	3.44017623095123
ENSG00000134970	TMED7	64.0862477433904	1.41414364670858	0.341571203355893	4.14011378246996	3.47133596437197e-05	0.0303865873166989	1.41414364670858	2.66501498801549
ENSG00000138821	SLC39A8	150.479710500548	1.80461558821524	0.426681978957542	4.22941599882946	2.34298742151782e-05	0.0262158746869214	1.80461558821524	3.49336063992243
ENSG00000142512	SIGLEC10	716.192790467886	1.74968312847422	0.385741697471368	4.5358931635958	5.73602130783719e-06	0.0117158235212575	1.74968312847422	3.36284696887912
ENSG00000144036	EXOC6B	37.7821997309495	-1.40819998451849	0.295903715820972	-4.75898040216055	1.94573324368627e-06	0.0103554550775458	1.40819998451849	-2.65405815780167
ENSG00000159189	C1QC	12.2917165154439	1.90037841900446	0.446238480399176	4.25866101306302	2.05655061609519e-05	0.0262158746869214	1.90037841900446	3.73311103300734
ENSG00000163568	AIM2	50.3250526203557	1.78783307415229	0.439089649754476	4.07168120485641	4.66750315035558e-05	0.0380493015951195	1.78783307415229	3.45295868942741
ENSG00000166446	CDYL2	18.5839713804464	1.73665423530309	0.412172658098888	4.21341445430482	2.51538883344251e-05	0.0262158746869214	1.73665423530309	3.33261401922939
ENSG00000168062	BATF2	51.8504968879869	1.93118287105637	0.442073096347066	4.36846957440771	1.25120244004026e-05	0.0219049798609905	1.93118287105637	3.81367755915372
ENSG00000171860	C3AR1	633.258830650798	1.97882206210094	0.425784868274983	4.64746920227085	3.36032243887612e-06	0.0103554550775458	1.97882206210094	3.94171115834307
ENSG00000173369	C1QB	27.6039203181772	2.06553389637397	0.44455795251961	4.64626464258979	3.37999349736298e-06	0.0103554550775458	2.06553389637397	4.18588853918257
ENSG00000173372	C1QA	23.1514115571071	2.08621435363279	0.445946645274274	4.67817030521597	2.89446102861776e-06	0.0103554550775458	2.08621435363279	4.24632370183101
ENSG00000187260	WDR86	10.4524019336527	-1.64663912740282	0.396966723454957	-4.14805330046679	3.35314342790838e-05	0.0303865873166989	1.64663912740282	-3.13103389706167
ENSG00000198915	RASGEF1A	9.40338839427743	1.45175117594722	0.359889393088466	4.03388153090236	5.48629856925493e-05	0.0380493015951195	1.45175117594722	2.73539878826481
